# Supplementary material for: Optimizing radiomics for prostate cancer diagnosis: feature selection strategies, machine learning classifiers, and MRI sequences
Source: PubMed Central journal article supplement (PMC11535140; doi:10.1186/s13244-024-01783-9), 2024-11-04

# Optimizing Radiomics for Prostate Cancer Diagnosis: Feature Selection Strategies, Machine learning Classifiers, and MRI sequences

## ELECTRONIC SUPPLEMENTARY MATERIAL

**Supplementary Table S1.** Configuration of PyRadiomics parameters used for radiomic feature extraction.

| Pyradiomics Parameters                                    | Parameters Values                                                                                                                                                                                                                                                                                                                                                                                                   |
|-----------------------------------------------------------|---------------------------------------------------------------------------------------------------------------------------------------------------------------------------------------------------------------------------------------------------------------------------------------------------------------------------------------------------------------------------------------------------------------------|
| "imageType"                                               | <ul style="list-style-type: none"> <li>• Original,</li> <li>• Wavelet,</li> <li>• Gradient,</li> <li>• LoG with sigma: 2mm, 3mm, 4mm and 5mm.</li> </ul>                                                                                                                                                                                                                                                            |
| "featureClass"                                            | <ul style="list-style-type: none"> <li>• firstorder</li> <li>• glcm</li> <li>• glrlm</li> <li>• glszm</li> <li>• gldm</li> <li>• shape</li> </ul>                                                                                                                                                                                                                                                                   |
| "settings"                                                | resampledPixelSpacing: [1, 1, 1]<br>normalize: True<br>normalizeScale: 100<br>padDistance: 5<br>binWidth: <ul style="list-style-type: none"> <li>• ProstateNET:                             <ul style="list-style-type: none"> <li>○ T2: 7</li> <li>○ ADC: 7</li> </ul> </li> <li>• ProstateX2:                             <ul style="list-style-type: none"> <li>○ T2: 6</li> <li>○ ADC: 3</li> </ul> </li> </ul> |
| Parameters other than those reported were set to default. |                                                                                                                                                                                                                                                                                                                                                                                                                     |

**Supplementary Table S2.** CheckList for EvaluAtion of Radiomics research (CLEAR checklist)

| Section               | No | Item                                                          | Yes                                 | No                                  | n/a                      | Page                                                           |
|-----------------------|----|---------------------------------------------------------------|-------------------------------------|-------------------------------------|--------------------------|----------------------------------------------------------------|
| <b>Title</b>          |    |                                                               |                                     |                                     |                          |                                                                |
|                       | 1  | Relevant title, specifying the radiomic methodology           | <input checked="" type="checkbox"/> | <input type="checkbox"/>            | <input type="checkbox"/> | 1                                                              |
| <b>Abstract</b>       |    |                                                               |                                     |                                     |                          |                                                                |
|                       | 2  | Structured summary with relevant information                  | <input checked="" type="checkbox"/> | <input type="checkbox"/>            | <input type="checkbox"/> | 1                                                              |
| <b>Keywords</b>       |    |                                                               |                                     |                                     |                          |                                                                |
|                       | 3  | Relevant keywords for radiomics                               | <input checked="" type="checkbox"/> | <input type="checkbox"/>            | <input type="checkbox"/> | 2                                                              |
| <b>Introduction</b>   |    |                                                               |                                     |                                     |                          |                                                                |
|                       | 4  | Scientific or clinical background                             | <input checked="" type="checkbox"/> | <input type="checkbox"/>            | <input type="checkbox"/> | 3                                                              |
|                       | 5  | Rationale for using a radiomic approach                       | <input checked="" type="checkbox"/> | <input type="checkbox"/>            | <input type="checkbox"/> | 3-4                                                            |
|                       | 6  | Study objective(s)                                            | <input checked="" type="checkbox"/> | <input type="checkbox"/>            | <input type="checkbox"/> | 4                                                              |
| <b>Method</b>         |    |                                                               |                                     |                                     |                          |                                                                |
| <i>Study Design</i>   | 7  | Adherence to guidelines or checklists (e.g., CLEAR checklist) | <input checked="" type="checkbox"/> | <input type="checkbox"/>            | <input type="checkbox"/> | 9                                                              |
|                       | 8  | Ethical details (e.g., approval, consent, data protection)    | <input checked="" type="checkbox"/> | <input type="checkbox"/>            | <input type="checkbox"/> | Ethics declarations                                            |
|                       | 9  | Sample size calculation                                       | <input type="checkbox"/>            | <input checked="" type="checkbox"/> | <input type="checkbox"/> | -                                                              |
|                       | 10 | Study nature (e.g., retrospective, prospective)               | <input checked="" type="checkbox"/> | <input type="checkbox"/>            | <input type="checkbox"/> | 4                                                              |
|                       | 11 | Eligibility criteria                                          | <input checked="" type="checkbox"/> | <input type="checkbox"/>            | <input type="checkbox"/> | 4-5                                                            |
|                       | 12 | Flowchart for technical pipeline                              | <input checked="" type="checkbox"/> | <input type="checkbox"/>            | <input type="checkbox"/> | Fig. 1                                                         |
| <i>Data</i>           | 13 | Data source (e.g., private, public)                           | <input checked="" type="checkbox"/> | <input type="checkbox"/>            | <input type="checkbox"/> | 4                                                              |
|                       | 14 | Data overlap                                                  | <input checked="" type="checkbox"/> | <input type="checkbox"/>            | <input type="checkbox"/> | 4-5                                                            |
|                       | 15 | Data split methodology                                        | <input checked="" type="checkbox"/> | <input type="checkbox"/>            | <input type="checkbox"/> | 8                                                              |
|                       | 16 | Imaging protocol (i.e., image acquisition and processing)     | <input checked="" type="checkbox"/> | <input type="checkbox"/>            | <input type="checkbox"/> | 5                                                              |
|                       | 17 | Definition of non-radiomic predictor variables                | <input type="checkbox"/>            | <input checked="" type="checkbox"/> | <input type="checkbox"/> | Beyond the intended focus of this study                        |
|                       | 18 | Definition of the reference standard (i.e., outcome variable) | <input checked="" type="checkbox"/> | <input type="checkbox"/>            | <input type="checkbox"/> | 5                                                              |
| <i>Segmentation</i>   | 19 | Segmentation strategy                                         | <input checked="" type="checkbox"/> | <input type="checkbox"/>            | <input type="checkbox"/> | 4-5                                                            |
|                       | 20 | Details of operators performing segmentation                  | <input type="checkbox"/>            | <input checked="" type="checkbox"/> | <input type="checkbox"/> | Segmentations performed by experts across 12 clinical centers. |
| <i>Pre-processing</i> | 21 | Image pre-processing details                                  | <input checked="" type="checkbox"/> | <input type="checkbox"/>            | <input type="checkbox"/> | 5                                                              |
|                       | 22 | Resampling method and its parameters                          | <input checked="" type="checkbox"/> | <input type="checkbox"/>            | <input type="checkbox"/> | 5                                                              |
|                       | 23 | Discretization method and its parameters                      | <input checked="" type="checkbox"/> | <input type="checkbox"/>            | <input type="checkbox"/> | 5                                                              |

|                           |    |                                                                  |                                     |                                     |                                     |                                         |
|---------------------------|----|------------------------------------------------------------------|-------------------------------------|-------------------------------------|-------------------------------------|-----------------------------------------|
|                           | 24 | Image types (e.g., original, filtered, transformed)              | <input checked="" type="checkbox"/> | <input type="checkbox"/>            | <input type="checkbox"/>            | 5-6                                     |
| <i>Feature extraction</i> | 25 | Feature extraction method                                        | <input checked="" type="checkbox"/> | <input type="checkbox"/>            | <input type="checkbox"/>            | 5                                       |
|                           | 26 | Feature classes                                                  | <input checked="" type="checkbox"/> | <input type="checkbox"/>            | <input type="checkbox"/>            | 5-6                                     |
|                           | 27 | Number of features                                               | <input checked="" type="checkbox"/> | <input type="checkbox"/>            | <input type="checkbox"/>            | 6                                       |
|                           | 28 | Default configuration statement for remaining parameters         | <input checked="" type="checkbox"/> | <input type="checkbox"/>            | <input type="checkbox"/>            | Suppl. Table 1                          |
| <i>Data preparation</i>   | 29 | Handling of missing data                                         | <input type="checkbox"/>            | <input type="checkbox"/>            | <input checked="" type="checkbox"/> | No missing data                         |
|                           | 30 | Details of class imbalance                                       | <input checked="" type="checkbox"/> | <input type="checkbox"/>            | <input type="checkbox"/>            | Table 1                                 |
|                           | 31 | Details of segmentation reliability analysis                     | <input type="checkbox"/>            | <input checked="" type="checkbox"/> | <input type="checkbox"/>            |                                         |
|                           | 32 | Feature scaling details (e.g., normalization, standardization)   | <input checked="" type="checkbox"/> | <input type="checkbox"/>            | <input type="checkbox"/>            | 5                                       |
|                           | 33 | Dimension reduction details                                      | <input checked="" type="checkbox"/> | <input type="checkbox"/>            | <input type="checkbox"/>            | 6-8                                     |
| <i>Modeling</i>           | 34 | Algorithm details                                                | <input checked="" type="checkbox"/> | <input type="checkbox"/>            | <input type="checkbox"/>            | 8                                       |
|                           | 35 | Training and tuning details                                      | <input checked="" type="checkbox"/> | <input type="checkbox"/>            | <input type="checkbox"/>            | 8                                       |
|                           | 36 | Handling of confounders                                          | <input checked="" type="checkbox"/> | <input type="checkbox"/>            | <input type="checkbox"/>            | 8                                       |
|                           | 37 | Model selection strategy                                         | <input checked="" type="checkbox"/> | <input type="checkbox"/>            | <input type="checkbox"/>            | 8                                       |
| <i>Evaluation</i>         | 38 | Testing technique (e.g., internal, external)                     | <input checked="" type="checkbox"/> | <input type="checkbox"/>            | <input type="checkbox"/>            | 8                                       |
|                           | 39 | Performance metrics and rationale for choosing                   | <input checked="" type="checkbox"/> | <input type="checkbox"/>            | <input type="checkbox"/>            | 8-9                                     |
|                           | 40 | Uncertainty evaluation and measures (e.g., confidence intervals) | <input checked="" type="checkbox"/> | <input type="checkbox"/>            | <input type="checkbox"/>            | 8                                       |
|                           | 41 | Statistical performance comparison (e.g., DeLong's test)         | <input checked="" type="checkbox"/> | <input type="checkbox"/>            | <input type="checkbox"/>            | 8                                       |
|                           | 42 | Comparison with non-radiomic and combined methods                | <input type="checkbox"/>            | <input checked="" type="checkbox"/> | <input type="checkbox"/>            | Beyond the intended focus of this study |
|                           | 43 | Interpretability and explainability methods                      | <input type="checkbox"/>            | <input checked="" type="checkbox"/> | <input type="checkbox"/>            | Beyond the intended focus of this study |
| <b>Results</b>            |    |                                                                  |                                     |                                     |                                     |                                         |
|                           | 44 | Baseline demographic and clinical characteristics                | <input checked="" type="checkbox"/> | <input type="checkbox"/>            | <input type="checkbox"/>            | Table 1                                 |
|                           | 45 | Flowchart for eligibility criteria                               | <input type="checkbox"/>            | <input type="checkbox"/>            | <input checked="" type="checkbox"/> |                                         |
|                           | 46 | Feature statistics (e.g., reproducibility, feature selection)    | <input checked="" type="checkbox"/> | <input type="checkbox"/>            | <input type="checkbox"/>            | Fig.6                                   |
|                           | 47 | Model performance evaluation                                     | <input checked="" type="checkbox"/> | <input type="checkbox"/>            | <input type="checkbox"/>            | Tables 2-5, Fig. 2-5                    |
|                           | 48 | Comparison with non-radiomic and combined approaches             | <input type="checkbox"/>            | <input checked="" type="checkbox"/> | <input type="checkbox"/>            | Beyond the intended focus of this study |
| <b>Discussion</b>         |    |                                                                  |                                     |                                     |                                     |                                         |
|                           | 49 | Overview of important findings                                   | <input checked="" type="checkbox"/> | <input type="checkbox"/>            | <input type="checkbox"/>            | 12                                      |
|                           | 50 | Previous works with differences from the current study           | <input checked="" type="checkbox"/> | <input type="checkbox"/>            | <input type="checkbox"/>            | 13                                      |
|                           | 51 | Practical implications                                           | <input checked="" type="checkbox"/> | <input type="checkbox"/>            | <input type="checkbox"/>            | 14                                      |

|                           |    |                                                                    |                                     |                                     |                                     |                          |
|---------------------------|----|--------------------------------------------------------------------|-------------------------------------|-------------------------------------|-------------------------------------|--------------------------|
|                           | 52 | Strengths and limitations (e.g., bias and generalizability issues) | <input checked="" type="checkbox"/> | <input type="checkbox"/>            | <input type="checkbox"/>            | 14                       |
| <b>Open Science</b>       |    |                                                                    |                                     |                                     |                                     |                          |
| <i>Data availability</i>  | 53 | Sharing images along with segmentation data [n/e]                  | <input type="checkbox"/>            | <input type="checkbox"/>            | <input checked="" type="checkbox"/> | Data privacy constraints |
|                           | 54 | Sharing radiomic feature data                                      | <input type="checkbox"/>            | <input type="checkbox"/>            | <input checked="" type="checkbox"/> | Data privacy constraints |
| <i>Code availability</i>  | 55 | Sharing pre-processing scripts or settings                         | <input checked="" type="checkbox"/> | <input type="checkbox"/>            | <input type="checkbox"/>            | Supp. Table 1            |
|                           | 56 | Sharing source code for modeling                                   | <input type="checkbox"/>            | <input checked="" type="checkbox"/> | <input type="checkbox"/>            | Available upon request   |
| <i>Model availability</i> | 57 | Sharing final model files                                          | <input type="checkbox"/>            | <input checked="" type="checkbox"/> | <input type="checkbox"/>            | Available upon request   |
|                           | 58 | Sharing a ready-to-use system [n/e]                                | <input type="checkbox"/>            | <input checked="" type="checkbox"/> | <input type="checkbox"/>            |                          |

**Yes**, details provided; **No**, details not provided; **n/e**, not essential; **n/a**, not applicable

**Supplementary Table S3. METHodological RadiomICs Score (METRICS)**

| Items/Conditions                               | Definitions                                                                                                   | Weights | Answers |
|------------------------------------------------|---------------------------------------------------------------------------------------------------------------|---------|---------|
| <b>Study Design</b>                            |                                                                                                               |         |         |
| Item#1                                         | Adherence to radiomics and/or machine learning-specific checklists or guidelines                              | 0.0368  | yes     |
| Item#2                                         | Eligibility criteria that describe a representative study population                                          | 0.0735  | yes     |
| Item#3                                         | High-quality reference standard with a clear definition                                                       | 0.0919  | yes     |
| <b>Imaging Data</b>                            |                                                                                                               |         |         |
| Item#4                                         | Multi-center                                                                                                  | 0.0438  | yes     |
| Item#5                                         | Clinical translatability of the imaging data source for radiomics analysis                                    | 0.0292  | yes     |
| Item#6                                         | Imaging protocol with acquisition parameters                                                                  | 0.0438  | no      |
| Item#7                                         | The interval between imaging used and reference standard                                                      | 0.0292  | yes     |
| <b>Segmentation</b>                            |                                                                                                               |         |         |
| Condition#1                                    | Does the study include segmentation?                                                                          |         | yes     |
| Condition#2                                    | Does the study include fully automated segmentation?                                                          |         | no      |
| Item#8                                         | Transparent description of segmentation methodology                                                           | 0.0337  | no      |
| Item#9                                         | Formal evaluation of fully automated segmentation                                                             | 0.0225  | n/a     |
| Item#10                                        | Test set segmentation masks produced by a single reader or automated tool                                     | 0.0112  | no      |
| <b>Image Processing and Feature Extraction</b> |                                                                                                               |         |         |
| Condition#3                                    | Does the study include hand-crafted feature extraction?                                                       |         | yes     |
| Item#11                                        | Appropriate use of image preprocessing techniques with transparent description                                | 0.0622  | yes     |
| Item#12                                        | Use of standardized feature extraction software                                                               | 0.0311  | yes     |
| Item#13                                        | Transparent reporting of feature extraction parameters, otherwise providing a default configuration statement | 0.0415  | yes     |
| <b>Feature Processing</b>                      |                                                                                                               |         |         |
| Condition#4                                    | Does the study include tabular data?                                                                          |         | yes     |
| Condition#5                                    | Does the study include end-to-end deep learning?                                                              |         | no      |
| Item#14                                        | Removal of non-robust features                                                                                | 0.0200  | yes     |
| Item#15                                        | Removal of redundant features                                                                                 | 0.0200  | yes     |
| Item#16                                        | Appropriateness of dimensionality compared to data size                                                       | 0.0300  | yes     |
| Item#17                                        | Robustness assessment of end-to-end deep learning pipelines                                                   | 0.0200  | n/a     |
| <b>Preparation for Modeling</b>                |                                                                                                               |         |         |
| Item#18                                        | Proper data partitioning process                                                                              | 0.0599  | yes     |
| Item#19                                        | Handling of confounding factors                                                                               | 0.0300  | yes     |
| <b>Metrics and Comparison</b>                  |                                                                                                               |         |         |
| Item#20                                        | Use of appropriate performance evaluation metrics for task                                                    | 0.0352  | yes     |

|                                                                                                                                                                                                                                 |                                                                          |        |     |
|---------------------------------------------------------------------------------------------------------------------------------------------------------------------------------------------------------------------------------|--------------------------------------------------------------------------|--------|-----|
| Item#21                                                                                                                                                                                                                         | Consideration of uncertainty                                             | 0.0234 | yes |
| Item#22                                                                                                                                                                                                                         | Calibration assessment                                                   | 0.0176 | no  |
| Item#23                                                                                                                                                                                                                         | Use of uni-parametric imaging or proof of its inferiority                | 0.0117 | yes |
| Item#24                                                                                                                                                                                                                         | Comparison with a non-radiomic approach or proof of added clinical value | 0.0293 | no  |
| Item#25                                                                                                                                                                                                                         | Comparison with simple or classical statistical models                   | 0.0176 | no  |
| <b>Testing</b>                                                                                                                                                                                                                  |                                                                          |        |     |
| Item#26                                                                                                                                                                                                                         | Internal testing                                                         | 0.0375 | yes |
| Item#27                                                                                                                                                                                                                         | External testing                                                         | 0.0749 | yes |
| <b>Open Science</b>                                                                                                                                                                                                             |                                                                          |        |     |
| Item#28                                                                                                                                                                                                                         | Data availability                                                        | 0.0075 | no  |
| Item#29                                                                                                                                                                                                                         | Code availability                                                        | 0.0075 | no  |
| Item#30                                                                                                                                                                                                                         | Model availability                                                       | 0.0075 | no  |
| <b>Total METRICS score: 81.7%</b>                                                                                                                                                                                               |                                                                          |        |     |
| <b>Quality category *: Excellent</b>                                                                                                                                                                                            |                                                                          |        |     |
| * $0 \leq \text{score} < 20\%$ , "very low"; $20 \leq \text{score} < 40\%$ , "low"; $40 \leq \text{score} < 60\%$ , "moderate"; $60 \leq \text{score} < 80\%$ , "good"; $80 \leq \text{score} \leq 100\%$ , "excellent" quality |                                                                          |        |     |

**Supplementary Figure S1.** Average models' performance in Setting 1 (across folds) for each feature selection method, ML classifier and MRI sequence. Red boxes indicate to the best performing combination of feature selection methods and ML classifiers for each metric.

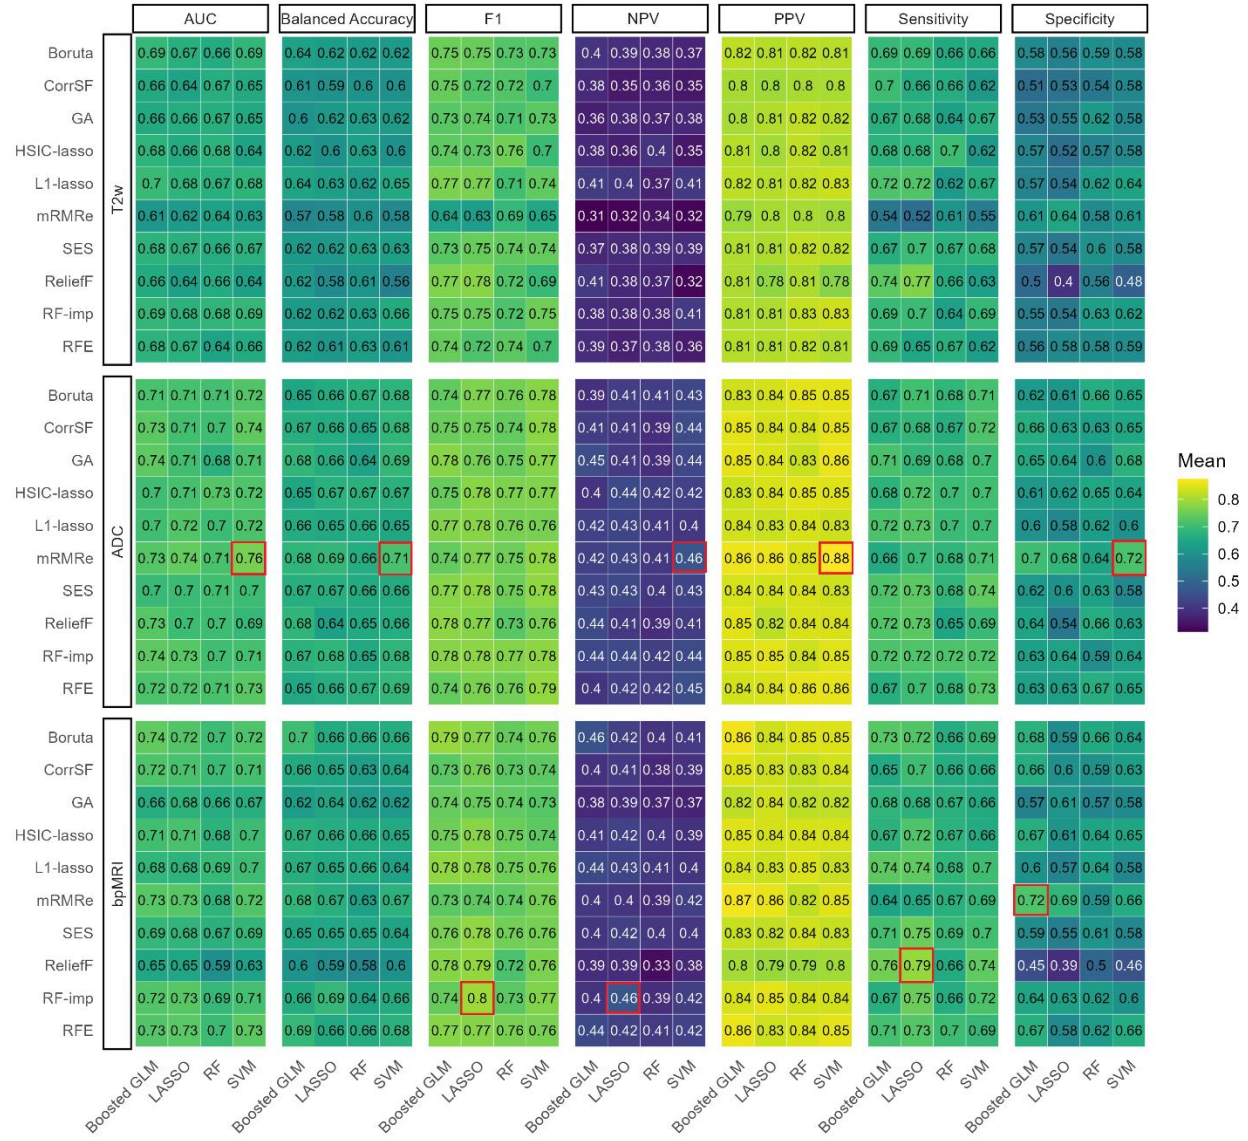

**Supplementary Figure S2.** Models' performance in Setting 2 for each feature selection method, ML classifier and MRI sequence. Red boxes indicate to the best performing combination of feature selection methods and ML classifiers for each metric.

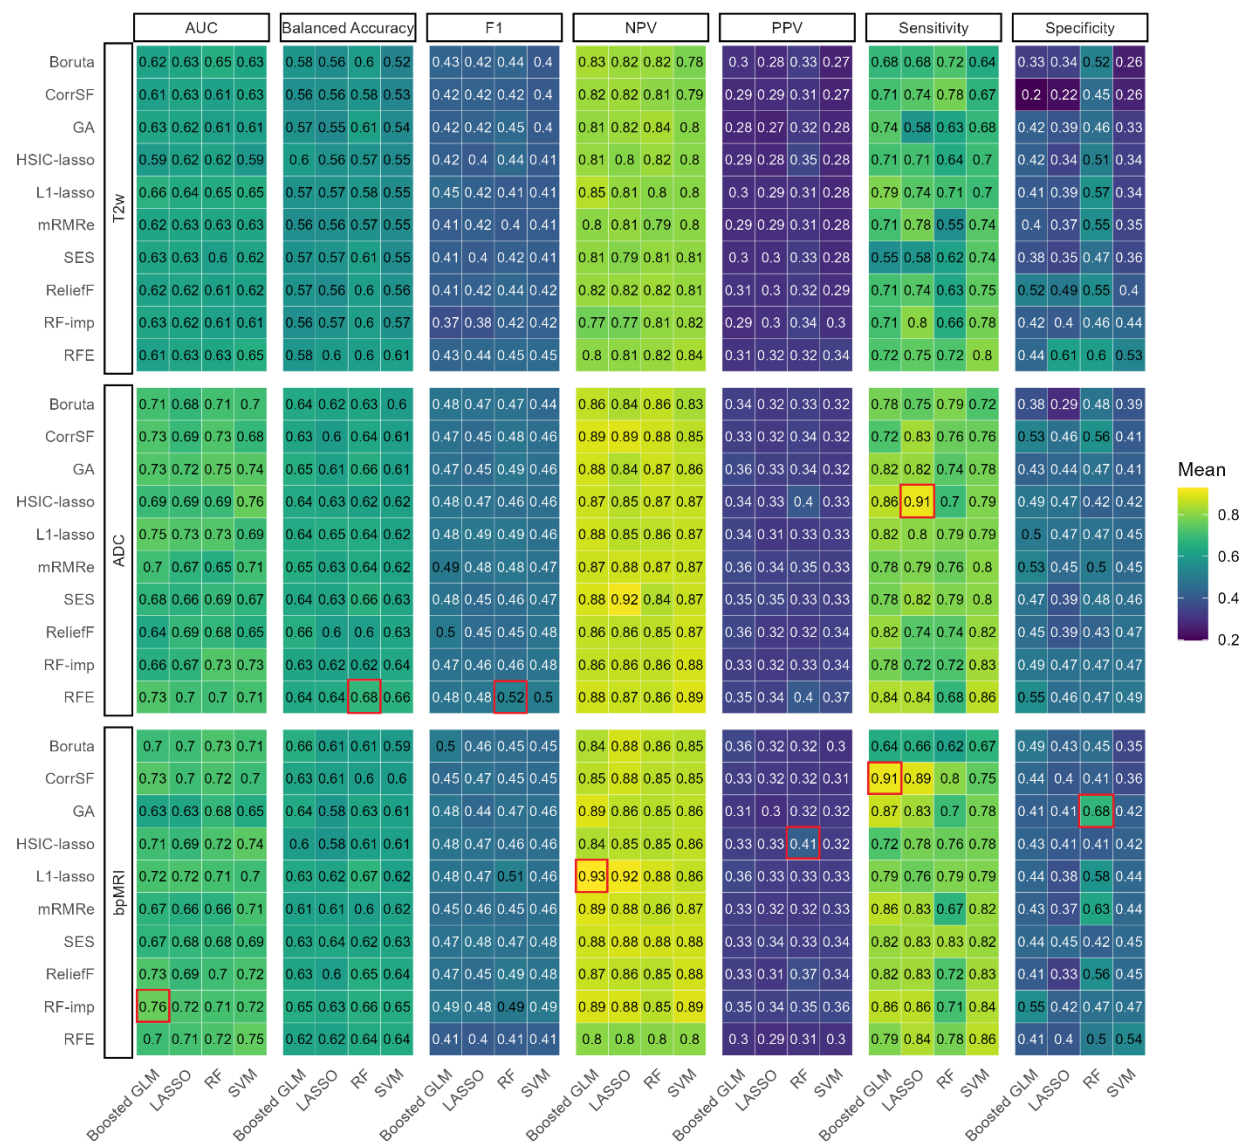



**Supplementary Figure S3.** Results of Delong’s test grouped based on (A) the MRI sequence, (B) the Feature Selection method, and (C) the ML classifier. Each colored point indicates how many times a specific model was found to have significantly higher ROC AUC than others. The superiority of certain groups can be determined by the larger number of points (models) and the larger number of counts per model. Specifically, significant differences were found mostly for models containing either bpMRI or solely ADC features, combined with RF-imp, L1-lasso and RFE feature selection methods. Models trained with RF, SVM or Boosted GLM had a marginal superiority to the ones based on LASSO classifier.

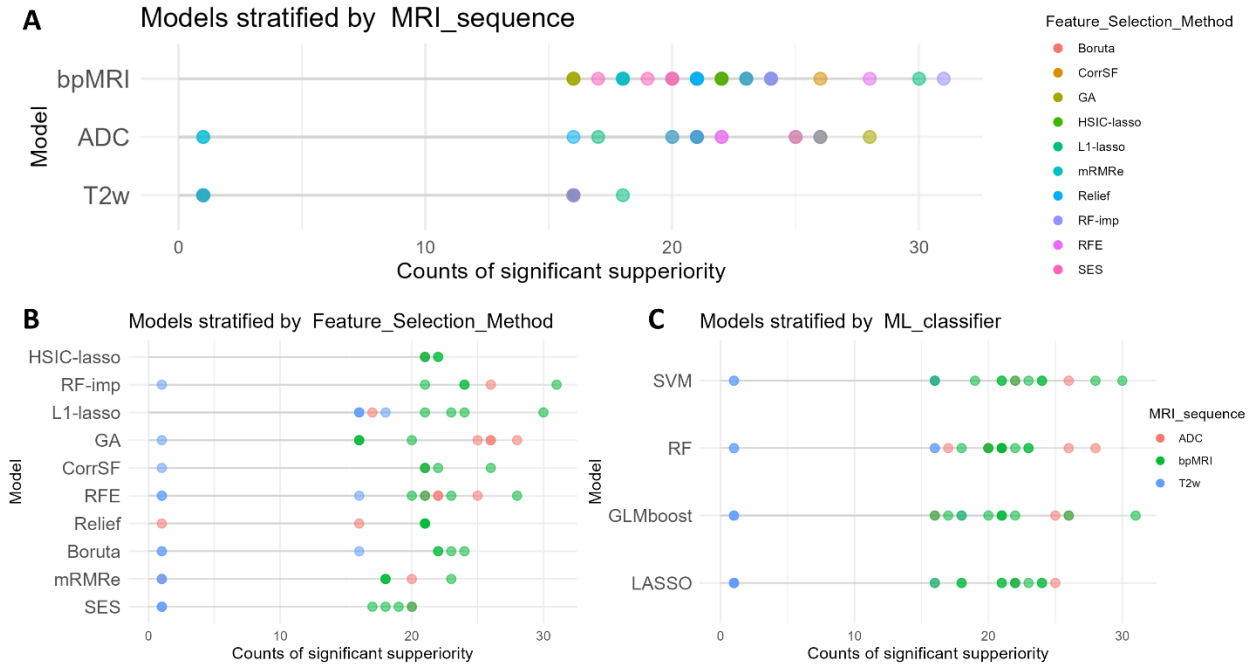

Supplement: 13244_2024_1783_MOESM1_ESM.pdf [file 13244_2024_1783_MOESM1_ESM.pdf]
